# Supplementary material for: Bio-inspired antibacterial coatings on urinary stents for encrustation prevention
Source: Royal Society of Chemistry journal article supplement (doi:10.1039/d1tb02318g), 2021-12-22

## Supplementary Information

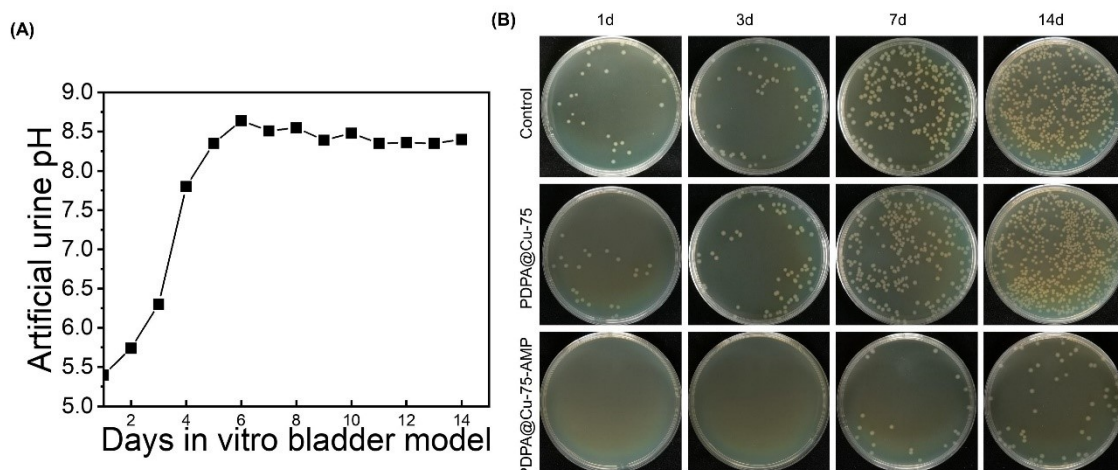

**Fig S1** (A) Artificial urine pH of in vitro bladder model in 14 days. (B) Antibacterial effect of control, PDPA@Cu-75, and PDPA@Cu-75-AMP coatings in vitro in 2 weeks.

**Fig S2** PDPA@Cu-75-AMP coating antibacterial effect after soaked in pH 8.5 PBS for 1 to 10 weeks.

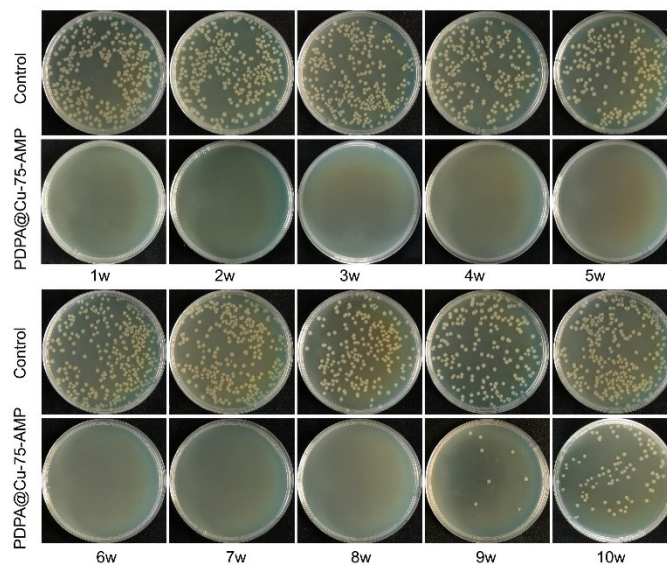

Supplement: d1tb02318g1.pdf [file d1tb02318g1.pdf]
